# Supplementary material for: Virulence Inhibitors from Brazilian Peppertree Block Quorum Sensing and Abate Dermonecrosis in Skin Infection Models
Source: PubMed Central journal article supplement (PMC5301492; doi:10.1038/srep42275), 2017-02-10
Supplement: srep42275-s1.pdf [file srep42275-s1.pdf]

## **Virulence Inhibitors from Brazilian Peppertree Block Quorum Sensing and Abate Dermonecrosis in Skin Infection Models**

Amelia Muhs<sup>1\*</sup>, James T. Lyles<sup>1\*</sup>, Corey P. Parlet<sup>2\*</sup>, Kate Nelson<sup>3</sup>, Jeffery S. Kavanaugh<sup>2</sup>, Alexander R. Horswill<sup>2†</sup>, and Cassandra L. Quave<sup>1,3†</sup>.

### **Affiliation**

<sup>1</sup>Center for the Study of Human Health, Emory University, 550 Asbury Circle, Candler Library 107E, Atlanta, Georgia, USA

<sup>2\*</sup>Department of Dermatology, Emory University School of Medicine, 615 Michael St., Rm 105L Whitehead Bldg., Atlanta, GA, USA

<sup>3</sup>Department of Microbiology, Roy J. and Lucille A. Carver College of Medicine, University of Iowa, Iowa City, IA USA

\*These authors contributed equally to this work.

† Corresponding authors. Correspondence and requests for materials should be addressed to CLQ (email: [cquave@emory.edu](mailto:cquave@emory.edu)).

**Supplementary Table 1: English translation of *Historia Naturalis Brasiliae* section “*De Aroeira eiusque qualitatibus*”.** Note the reference to medicinal uses of the plant, including the fruit oils and resin as plasters (topical applications) and aqueous leaf extractions to “drive out disease”, most likely taken as an internal medicament. Latin excerpt from: Piso, W. *Historia Naturalis Brasiliae* (Joannes de Laet, 1648).

| Original Latin                                                                                                                                                                                                                                                                                                                                                                                                                                                                                                                                                                                                                                                                                                                                                                                                                                                                                                                                                                                                                                                                                                                                                                                                                                                                                                                                                                                                                                                                                                                                                                                                                                                                                                                                                                                                                                               | English Translation                                                                                                                                                                                                                                                                                                                                                                                                                                                                                                                                                                                                                                                                                                                                                                                                                                                                                                                                                                                                                                                                                                                                                                                                                                                                                                                                                                                                                                                                                                                                                                                                                                                                                                                                                                                                                                                                                                                                                                                                                                                                                                                                                                                                 |
|--------------------------------------------------------------------------------------------------------------------------------------------------------------------------------------------------------------------------------------------------------------------------------------------------------------------------------------------------------------------------------------------------------------------------------------------------------------------------------------------------------------------------------------------------------------------------------------------------------------------------------------------------------------------------------------------------------------------------------------------------------------------------------------------------------------------------------------------------------------------------------------------------------------------------------------------------------------------------------------------------------------------------------------------------------------------------------------------------------------------------------------------------------------------------------------------------------------------------------------------------------------------------------------------------------------------------------------------------------------------------------------------------------------------------------------------------------------------------------------------------------------------------------------------------------------------------------------------------------------------------------------------------------------------------------------------------------------------------------------------------------------------------------------------------------------------------------------------------------------|---------------------------------------------------------------------------------------------------------------------------------------------------------------------------------------------------------------------------------------------------------------------------------------------------------------------------------------------------------------------------------------------------------------------------------------------------------------------------------------------------------------------------------------------------------------------------------------------------------------------------------------------------------------------------------------------------------------------------------------------------------------------------------------------------------------------------------------------------------------------------------------------------------------------------------------------------------------------------------------------------------------------------------------------------------------------------------------------------------------------------------------------------------------------------------------------------------------------------------------------------------------------------------------------------------------------------------------------------------------------------------------------------------------------------------------------------------------------------------------------------------------------------------------------------------------------------------------------------------------------------------------------------------------------------------------------------------------------------------------------------------------------------------------------------------------------------------------------------------------------------------------------------------------------------------------------------------------------------------------------------------------------------------------------------------------------------------------------------------------------------------------------------------------------------------------------------------------------|
| <p style="text-align: center;"><b>Cap. XI</b><br/><b>De Aroeira eiusque qualitatibus</b></p> <p>Arbor arenosis, littore imprimis &amp; promontorio Olindae frequens, <i>Aroeira</i> nuncupatur. Myrto silvestri nostrati qualitate non valde absimilis, ad Lentiscos tamen referri debet. Praeter eximias facultates, quas cum <i>Araca</i>, &amp; Myrto, arboribus habet communes, hisce peculiaribus pollet, quod resinam fundat fragrantissimam instar Lentisci, ex qua emplastrum adversus frigidos affectus componitur.</p> <p>Foliis convenit cum <i>Guabirabae</i> foliis, nisi quod hujus sint Paulo minora: Sunt autem in ramulis bina sibi invicem opposite, &amp; quinque aut septem in extremitate. Ad cujuslibet ramuli exortum, ramulus est brevior, plenus, flosculis minimis, qui constant quinque foliolis ex albo subluteis.</p> <p>Fructum fert (sert) exiguum sanguinei coloris, racematim congestum ac pendulum, cujus acrimonia &amp; siccitate carnes recentes à putredine conservatur.</p> <p>Oleum quoque ex succulentis illius baccis exprimitur, eidem usui cum resina inserviens.</p> <p>Folia insignem &amp; nobilissimum odorem emitunt, si conterantur, quae subamara, cum quadam vi adstringendi, aromaticas calidasque partes habent conjunctas, quemadmodum è balneis &amp; lavacris, quae ex illis siunt, videre est.</p> <p>Has vero virtutes tum profunde exserit, ut per distillationem foliorum, imprimis recentium, odorifera &amp; adstringens aqua inde eliciatur, quae tum ad pellendos corporis affectus, tum ad delicias servatur.</p> <p>Tempore paroxysmi febricitanti, Empyricorum more, exhibent cum successu, oculos seu gemmas arboris ex aqua nocturne rori expositos.</p> <p>Caeterum sciendum est in ramis <i>Aroeira</i>, luxuriate saepe polypodium, illo quod è terra prosilit longe probatius.</p> | <p style="text-align: center;"><b>Cap. XI</b><br/><b>On Aroeira and its qualities</b></p> <p>The tree from sandy places, particularly frequent in shores and promontories of Olinda [historic city in the state of Pernambuco], is called Aroeira. In its quality not very different from the native wild Myrtle, it must remind one of the Lentisks. Besides certain uncommon properties, which it shares with the Araca &amp; Myrto trees, it flourishes in these in particular, because it pours extremely fragrant resin like that of the Lentisk, out of which one can make a plaster against cold affections.</p> <p>The leaves approximate those of the Guabirabae, except hers are smaller than those of the Paulo: they also are in the branch in pairs opposite each other, &amp; with five or seven ends. They spring up from any branch; the branch is shorter, stout, with minimal flowerettes, which consist of five leaflets of a white-saffron yellow [NT: sub- prefix probably points to a white out of the yellow].</p> <p>It bears fruit of an exiguous blood-color, with clusters of berries dense and hanging down, whose fresh flesh is preserved from rotting by pungency and dryness.</p> <p>Also, the oil of her succulent berries is pressed out, same use as the useful resin.</p> <p>The leaves emit a notable &amp; extremely noble odor when ground, slightly bitter, with binding force in a certain place, they have the aromatic and hot parts together, as it can be seen, for example, outside restrooms and baths, which is done out of these.</p> <p>It reveals these true excellent properties so profoundly that for the distillation of the leaves, especially when fresh, a fragrant &amp; binding water may be thence extracted, which at times can drive out disease from the body, at other times can be saved for pleasure.</p> <p>In times of feverish paroxysms, they appear with success in the custom of Empyrics, eyes or buds of the tree exposed out of the nocturnal water of the dew.</p> <p>Another thing that is to be known, the <i>Aroeira</i>, often a luxurious polypodium, in its branches that which is out of the ground bursts forth quite far.</p> |

**Supplementary Table 2: Summary of select previous reports of antimicrobial bioactivity from different tissues of *Schinus terebinthifolia*.**

| Plant Tissue | Extraction method                                  | Antimicrobial Bioactivity <sup>†</sup>                                                                                                                                                                                                                                                                                                                                                                                                               | Attributed Chemistry <sup>*</sup>                                                                       | Ref.         |
|--------------|----------------------------------------------------|------------------------------------------------------------------------------------------------------------------------------------------------------------------------------------------------------------------------------------------------------------------------------------------------------------------------------------------------------------------------------------------------------------------------------------------------------|---------------------------------------------------------------------------------------------------------|--------------|
| Stem bark    | Crude hydroethanolic extract                       | <u>Anti-viral</u> : Herpes Simplex Virus-1 (EC <sub>50</sub> : 14 µg mL <sup>-1</sup> ; SI: 22.5)                                                                                                                                                                                                                                                                                                                                                    | flavan-3-ols                                                                                            | <sup>1</sup> |
|              | Aqueous extract                                    | <u>Antifungal</u> : <i>Trichophyton rubrum</i> (MIC/MFC: 1 mg mL <sup>-1</sup> ); <i>Trichophyton. mentagrophytes</i> (MIC/MFC: 1 mg mL <sup>-1</sup> )                                                                                                                                                                                                                                                                                              | -                                                                                                       | <sup>2</sup> |
|              | Ethanol:water extract                              | <u>Antifungal</u> : <i>Trichophyton rubrum</i> (MIC/MFC: 62.5 µg mL <sup>-1</sup> ); <i>Trichophyton. mentagrophytes</i> (MIC/MFC: 62.5 µg mL <sup>-1</sup> )                                                                                                                                                                                                                                                                                        | -                                                                                                       | <sup>2</sup> |
|              | 50% Hydroalcoholic extract of                      | <u>Antibacterial</u> : <i>Staphylococcus aureus</i> (MIC: 250 µg mL <sup>-1</sup> ), <i>Pseudomonas aeruginosa</i> . (MIC: 1000 µg mL <sup>-1</sup> ), <i>Bacillus subtilis</i> (MIC: 1000 µg mL <sup>-1</sup> )<br><u>Antifungal</u> : <i>Candida albicans</i> . (MIC: 0.49 µg mL <sup>-1</sup> ), <i>C. parapsilosis</i> (MIC: 62.5 µg mL <sup>-1</sup> ), <i>C. tropicalis</i> . (MIC: 62.5 µg mL <sup>-1</sup> )                                 | -                                                                                                       | <sup>3</sup> |
| Stems        | Dichloromethane fraction of hydroalcoholic extract | <u>Antifungal</u> : <i>Paracoccidioides brasiliensis</i> (MFC: 30 µg mL <sup>-1</sup> )                                                                                                                                                                                                                                                                                                                                                              | biphenyl 4'-ethyl-4-methyl-2,2',6,6'-tetrahydroxy[1,1'-biphenyl]-4,4'-dicarboxylate                     | <sup>4</sup> |
| Fruits       | Essential oil extraction by hydrodistillation      | <u>Antibacterial</u> : <i>Corynebacterium</i> sp. (MIC: 3.55 µg mL <sup>-1</sup> ), <i>Bacillus</i> sp. (MIC: 7.11 µg mL <sup>-1</sup> ), <i>Nocardia</i> sp. (MIC: 7.11 µg mL <sup>-1</sup> ), <i>Enterobacter</i> sp. (MIC: 56.86 µg mL <sup>-1</sup> ), <i>Enterobacter agglomerans</i> (MIC: 28.43 µg mL <sup>-1</sup> ), <i>Escherichia coli</i> (MIC: 28.43 µg mL <sup>-1</sup> ), <i>Klebsiella oxytoca</i> (MIC: 28.43 µg mL <sup>-1</sup> ) | monoterpenes ( δ-3-carene, limonene, α-phellandrene, α-pinene) and Sesquiterpenes (trans-caryophellene) | <sup>5</sup> |
| Leaves       | Dichloromethane extract                            | <u>Antibacterial</u> : <i>Staphylococcus aureus</i> (MIC: 600 µg mL <sup>-1</sup> ), <i>Pseudomonas aeruginosa</i> (MIC: 550 µg mL <sup>-1</sup> ), <i>Escherichia coli</i> (MIC: 850 µg mL <sup>-1</sup> )<br><u>Antifungal</u> : <i>Aspergillus niger</i> (MIC: 750 µg mL <sup>-1</sup> ), <i>A. parasiticus</i> (MIC: 800 µg mL <sup>-1</sup> ), <i>Candida albicans</i> (MIC: 700 µg mL <sup>-1</sup> ),                                         | monoterpenes and sesquiterpenes                                                                         | <sup>6</sup> |
|              | Methanol extract; hydroalcoholic solution          | <u>Antibacterial</u> : <i>Streptococcus mutans</i> (MICA: 7 µg mL <sup>-1</sup> )<br><u>Antifungal</u> : <i>Candida albicans</i> (MICA: 7 µg mL <sup>-1</sup> )                                                                                                                                                                                                                                                                                      | -                                                                                                       | <sup>7</sup> |
|              | Hexane fraction of hydroalcoholic extract          | <u>Antifungal</u> : <i>Paracoccidioides brasiliensis</i> (MFC: 15-125 µg mL <sup>-1</sup> )                                                                                                                                                                                                                                                                                                                                                          | schinol                                                                                                 | <sup>4</sup> |

<sup>†</sup> SI: Selectivity Index; EC<sub>50</sub>: 50% inhibitory concentration; MIC: minimum inhibitory concentration; MFC: minimum fungicidal concentration; MICA: Minimal inhibitory concentration of adherence (biofilm)

<sup>\*</sup>“-“: no information on the bioactive chemistry provided

**Supplementary Table 3: 430D-F5 inhibits *agr* fluorescent reporter signaling with minimal growth (OD600nm) effects at concentrations < 64  $\mu\text{g mL}^{-1}$ . Data are reported as percent vehicle control.**

| Conc. 430D-F5<br>( $\mu\text{g mL}^{-1}$ ) | OD600 % Vehicle Control ( $\pm$ Standard Deviation)        |                       |                         |                        |
|--------------------------------------------|------------------------------------------------------------|-----------------------|-------------------------|------------------------|
|                                            | <i>agr I</i> (AH1677)                                      | <i>agr II</i> (AH430) | <i>agr III</i> (AH1747) | <i>agr IV</i> (AH1872) |
| 2                                          | 110.4 $\pm$ 2.3                                            | 114.9 $\pm$ 2.4       | 104.7 $\pm$ 1.9         | 102.6 $\pm$ 0.7        |
| 4                                          | 114.5 $\pm$ 2.3                                            | 118.9 $\pm$ 4.0       | 111.5 $\pm$ 1.4         | 101.4 $\pm$ 1.9        |
| 8                                          | 120.5 $\pm$ 3.1                                            | 125.4 $\pm$ 6.1       | 115.6 $\pm$ 3.0         | 108.3 $\pm$ 1.4        |
| 16                                         | 120.0 $\pm$ 9.8                                            | 126.9 $\pm$ 5.4       | 111.8 $\pm$ 1.4         | 104.8 $\pm$ 3.8        |
| 32                                         | 121.6 $\pm$ 3.8                                            | 122.7 $\pm$ 1.4       | 100.2 $\pm$ 2.9         | 96.3 $\pm$ 7.6         |
| 64                                         | 92.5 $\pm$ 4.2                                             | 108.5 $\pm$ 1.7       | 69.5 $\pm$ 1.4          | 85.9 $\pm$ 3.6         |
| 128                                        | 65.8 $\pm$ 1.5                                             | 76.9 $\pm$ 4.9        | 56.5 $\pm$ 0.6          | 65.2 $\pm$ 1.6         |
| Conc. 430D-F5<br>( $\mu\text{g mL}^{-1}$ ) | Fluorescence % Vehicle Control ( $\pm$ Standard Deviation) |                       |                         |                        |
|                                            | <i>agr I</i> (AH1677)                                      | <i>agr II</i> (AH430) | <i>agr III</i> (AH1747) | <i>agr IV</i> (AH1872) |
| 2                                          | 47.8 $\pm$ 4.2                                             | 51.5 $\pm$ 3.1        | 56.2 $\pm$ 1.7          | 83.5 $\pm$ 2.3         |
| 4                                          | 36.7 $\pm$ 2.3                                             | 33.3 $\pm$ 0.5        | 40.8 $\pm$ 0.8          | 64.7 $\pm$ 3.0         |
| 8                                          | 30.0 $\pm$ 1.1                                             | 25.1 $\pm$ 1.8        | 32.1 $\pm$ 0.5          | 54.9 $\pm$ 1.8         |
| 16                                         | 26.0 $\pm$ 4.6                                             | 18.6 $\pm$ 0.9        | 27.8 $\pm$ 0.3          | 51.4 $\pm$ 5.2         |
| 32                                         | 18.2 $\pm$ 2.2                                             | 14.6 $\pm$ 0.4        | 18.1 $\pm$ 0.3          | 41.3 $\pm$ 2.2         |
| 64                                         | 16.9 $\pm$ 0.8                                             | 14.3 $\pm$ 0.2        | 11.2 $\pm$ 0.3          | 27.0 $\pm$ 3.3         |
| 128                                        | 11.7 $\pm$ 0.3                                             | 13.3 $\pm$ 2.0        | 6.7 $\pm$ 0.2           | 21.0 $\pm$ 0.2         |

**Supplementary Table 4: Negative and positive ESI Mass spectrometry (m/z) analysis of 430D-F5.** The corresponding HPLC-DAD chromatogram is reported in Fig. 9a and putative structures in Fig. 9b.

| Peak # | RT (min) | (% Relative Abundance) |           | Formula ( $\Delta$ - ppm) <sup>a</sup>                 | Putative Compounds                                                                                                                                                                                                                                                                                                                                                                      | ESI Mode | m/z <sup>b</sup>                                        | MS <sup>2</sup>                     |
|--------|----------|------------------------|-----------|--------------------------------------------------------|-----------------------------------------------------------------------------------------------------------------------------------------------------------------------------------------------------------------------------------------------------------------------------------------------------------------------------------------------------------------------------------------|----------|---------------------------------------------------------|-------------------------------------|
|        |          | Neg. Mode              | Pos. Mode |                                                        |                                                                                                                                                                                                                                                                                                                                                                                         |          |                                                         |                                     |
| 1      | 39.78    | 0.00                   | 0.55      | C <sub>54</sub> H <sub>59</sub> O <sub>6</sub> (1.3)   | no matches                                                                                                                                                                                                                                                                                                                                                                              | +        | 391.2296,<br>413.2114,<br><b>803.4316</b>               | ND                                  |
| 2      | 45.70    | 11.65                  | 3.59      | C <sub>30</sub> H <sub>17</sub> O <sub>10</sub> (0.2)  | amentoflavone;<br>agathisflavone;<br>robustaflavone                                                                                                                                                                                                                                                                                                                                     | -        | 537.0828                                                | 375.1374,<br>443.1003               |
| 3      | 46.28    | 8.39                   | 2.14      | C <sub>30</sub> H <sub>17</sub> O <sub>10</sub> (0.2)  | see peak 1                                                                                                                                                                                                                                                                                                                                                                              | -        | 537.0826                                                | 375.1590,<br>443.1464               |
| 4      | 47.25    | 22.13                  | 3.37      | C <sub>30</sub> H <sub>21</sub> O <sub>10</sub> (1.4)  | chamaejasmin;<br>tetrahydroamentoflavone;<br>tetrahydrorobustaflavone                                                                                                                                                                                                                                                                                                                   | -        | <b>541.1147</b> ,<br>1083.2380                          | 389.1906,<br>415.1563               |
| 5      | 47.79    | 3.03                   | 0.62      | C <sub>30</sub> H <sub>21</sub> O <sub>10</sub> (-0.2) | see peak 3                                                                                                                                                                                                                                                                                                                                                                              | -        | 541.1138                                                | 389.1694,<br>415.1370               |
| 6      | 48.19    | 4.66                   | 0.73      | C <sub>53</sub> H <sub>95</sub> O <sub>15</sub> (-1.3) | no matches                                                                                                                                                                                                                                                                                                                                                                              | -        | 485.3277,<br>531.3344,<br><b>971.6664</b>               | 941.8088,<br>951.2601,<br>971.7518  |
| 7      | 49.49    | 1.14                   | 0         | C <sub>31</sub> H <sub>45</sub> O <sub>7</sub> (-0.6)  | no matches                                                                                                                                                                                                                                                                                                                                                                              | -        | 529.3167                                                | 485.5292                            |
| 8      | 51.12    | 0.53                   | 0.93      | C <sub>45</sub> H <sub>66</sub> O <sub>15</sub> (-0.3) | no matches                                                                                                                                                                                                                                                                                                                                                                              | +        | 415.2112,<br>432.2376,<br>493.2250,<br><b>846.4404</b>  | ND                                  |
| 9      | 51.43    | 0.27                   | 0.54      | C <sub>29</sub> H <sub>37</sub> O <sub>3</sub> (3.7)   | no matches                                                                                                                                                                                                                                                                                                                                                                              | -        | <b>433.2764</b> ,<br>455.2583                           | 400.9561,<br>415.3339               |
| 10     | 52.01    | 3.5                    | 0.43      | C <sub>30</sub> H <sub>45</sub> O <sub>6</sub> (0.5)   | no matches                                                                                                                                                                                                                                                                                                                                                                              | -        | 501.3224                                                | 439.3959                            |
| 11     | 53.10    | 0                      | 0.31      | C <sub>48</sub> H <sub>70</sub> O <sub>3</sub> (-9.6)  | no matches                                                                                                                                                                                                                                                                                                                                                                              | +        | 356.2793,<br><b>694.5253</b>                            | 542.3829,<br>676.2984               |
| 12     | 53.53    | 0.98                   | 1.31      | C <sub>40</sub> H <sub>69</sub> O <sub>8</sub> (0.9)   | no matches                                                                                                                                                                                                                                                                                                                                                                              | +        | 356.2795,<br>377.2299,<br><b>677.4993</b> ,<br>699.4816 | 557.3066,<br>647.4799               |
| 13     | 54.48    | 0                      | 2.11      | C <sub>40</sub> H <sub>69</sub> O <sub>8</sub> (2.5)   | no matches                                                                                                                                                                                                                                                                                                                                                                              | +        | <b>677.5004</b> ,<br>699.4831                           | 525.4104,<br>5557.4151,<br>647.5023 |
| 14     | 55.01    | 5.33                   | 2.33      | C <sub>30</sub> H <sub>45</sub> O <sub>4</sub> (0.9)   | albsapogenin; (3 $\alpha$ ,13 $\alpha$ ,14 $\beta$ ,<br>17 $\alpha$ ,20S,24Z)-3-hydroxy-21-<br>oxo-lanosta-8,24-dien-26-oic<br>acid; (13 $\alpha$ ,14 $\beta$ ,17 $\alpha$ ,20R,24Z)-<br>3 $\alpha$ -hydroxy-21-oxolanosta-<br>8,24-dien-26-oic acid; (3 $\alpha$ ,<br>13 $\alpha$ ,14 $\beta$ ,17 $\alpha$ ,24Z)-3-hydroxy-<br>7-oxo-lanosta-8,24-dien-26-<br>oic acid; mollinoic acid | -        | <b>469.3327</b> ,<br>515.3390,<br>939.6748              | 351.3897,<br>451.4088               |
| 15     | 55.44    | 2.14                   | 2.33      | C <sub>30</sub> H <sub>45</sub> O <sub>4</sub> (2.9)   | see peak 13                                                                                                                                                                                                                                                                                                                                                                             | -        | <b>469.3336</b> ,<br>515.3379                           | ND                                  |
| 16     | 56.12    | 0.63                   | 1.78      | C <sub>40</sub> H <sub>61</sub> O <sub>6</sub> (0.9)   | no matches                                                                                                                                                                                                                                                                                                                                                                              | -        | 533.3491,<br><b>637.4479</b> ,<br>683.4534              | 607.5950                            |
| 17     | 56.58    | 7.99                   | 8.52      | C <sub>30</sub> H <sub>45</sub> O <sub>4</sub> (1.0)   | see peak 13                                                                                                                                                                                                                                                                                                                                                                             | -        | <b>469.3328</b> ,<br>515.3391,                          | 407.4528                            |

| Peak # | RT (min) | (% Relative Abundance) |           | Formula ( $\Delta$ - ppm) <sup>a</sup>                | Putative Compounds      | ESI Mode | <i>m/z</i> <sup>b</sup>                    | MS <sup>2</sup>                    |
|--------|----------|------------------------|-----------|-------------------------------------------------------|-------------------------|----------|--------------------------------------------|------------------------------------|
|        |          | Neg. Mode              | Pos. Mode |                                                       |                         |          |                                            |                                    |
|        |          |                        |           |                                                       |                         |          | 939.6760                                   |                                    |
| 18     | 57.76    | 1.52                   | 2.86      | C <sub>30</sub> H <sub>47</sub> O <sub>4</sub> (3.1)  | see peak 13             | +        | 471.3483                                   | 453.4008                           |
| 19     | 58.06    | 1.05                   | 2.09      | C <sub>30</sub> H <sub>45</sub> O <sub>4</sub> (3.4)  | isomasticadienonic acid | +        | 469.3328                                   | 260.1903,<br>332.2413,<br>452.3980 |
| 20     | 58.32    | 1.09                   | 2.77      | C <sub>53</sub> H <sub>97</sub> O <sub>13</sub> (2.1) | no matches              | +        | 471.3485,<br>621.4551,<br><b>941.6944</b>  | 941.6543                           |
| 21     | 58.48    | 2.07                   | 0         | C <sub>30</sub> H <sub>45</sub> O <sub>6</sub> (0.1)  | no matches              | -        | 501.322                                    | 439.3777                           |
| 22     | 58.74    | 3.49                   | 10.4      | C <sub>30</sub> H <sub>45</sub> O <sub>4</sub> (2.2)  | see peak 13             | -        | <b>469.3333</b> ,<br>515.3384,<br>939.6736 | 439.4702                           |
| 23     | 59.35    | 2.39                   | 3.43      | C <sub>30</sub> H <sub>47</sub> O <sub>4</sub> (1.9)  | see peak 13             | +        | 471.3488                                   | 217.1912,<br>435.3044,<br>453.3376 |
| 24     | 59.73    | 5.37                   | 4.12      | C <sub>30</sub> H <sub>45</sub> O <sub>5</sub> (2.1)  | no matches              | -        | <b>485.3282</b> ,<br>531.3338,<br>971.6649 | 453.3968,<br>467.3944              |
| 25     | 60.44    | 2.06                   | 2.55      | C <sub>30</sub> H <sub>45</sub> O <sub>4</sub> (0.1)  | see peak 13             | -        | <b>469.3323</b> ,<br>515.3383,<br>939.6758 | 451.3724                           |
| 26     | 60.75    | 1.23                   | 1.48      | C <sub>30</sub> H <sub>45</sub> O <sub>4</sub> (0.8)  | see peak 13             | -        | <b>469.3327</b> ,<br>515.3375              | 451.3639                           |
| 27     | 61.72    | 1.56                   | 2.29      | C <sub>30</sub> H <sub>47</sub> O <sub>5</sub> (1.5)  | no matches              | -        | <b>487.3436</b> ,<br>533.3478,<br>975.6950 | 455.4224,<br>469.4080              |

<sup>a</sup>The empirical formula corresponds to the [M+H]<sup>+</sup> or [M-H]<sup>-</sup> ion as determined by the ionization mode.

<sup>b</sup>The reported ions correspond to the [M+H]<sup>+</sup> or [M-H]<sup>-</sup> ion as determined by the ionization mode. When multiple ions were formed, the number in **bold font** indicates the [M+H]<sup>+</sup> or [M-H]<sup>-</sup> and underwent MS<sup>2</sup> analysis.

**Supplementary Table 5: Description of bacterial strains used in the study.**

| Species                           | Strain ID         | Characteristics <sup>†</sup>                                                                                                                                                                                                                                                                                                                                           | Source <sup>†</sup> | Ref.          |
|-----------------------------------|-------------------|------------------------------------------------------------------------------------------------------------------------------------------------------------------------------------------------------------------------------------------------------------------------------------------------------------------------------------------------------------------------|---------------------|---------------|
| <i>Corynebacterium amycolatum</i> | SK46; HM-109      | Isolated from the right arm normal skin of a 57-year-old male; a reference genome for the species. Genbank sequence: ABZU000000000                                                                                                                                                                                                                                     | BEI; HMP            |               |
| <i>Corynebacterium striatum</i>   | FS-1              | Clinical isolate from Italy (2005-2007)                                                                                                                                                                                                                                                                                                                                | BEI                 |               |
| <i>Micrococcus luteus</i>         | SK58; HM-114      | Isolated from normal skin of the left arm of a 57-year-old male; a reference genome for the species. Genbank sequence: ADCD000000000                                                                                                                                                                                                                                   | BEI; HMP            |               |
| <i>Propionibacterium acnes</i>    | HL005PA2; HM-493  | Isolated from human skin; a reference genome for the species. Genbank sequence: ADZN000000000                                                                                                                                                                                                                                                                          | BEI; HMP            |               |
| <i>Staphylococcus aureus</i>      | LAC; AH1263       | USA300                                                                                                                                                                                                                                                                                                                                                                 |                     | <sup>8</sup>  |
|                                   | UAMS-1; ATCC49230 | Clinical isolate from osteomyelitis; USA200                                                                                                                                                                                                                                                                                                                            | MS                  | <sup>9</sup>  |
|                                   | UAMS-929          | $\Delta sarA$ mutant of UAMS-1                                                                                                                                                                                                                                                                                                                                         | MS                  | <sup>10</sup> |
|                                   | AH1677            | AH845 + pDB59 cm <sup>R</sup> ; <i>agr</i> type I YFP reporter; USA300                                                                                                                                                                                                                                                                                                 | AH                  | <sup>11</sup> |
|                                   | AH430             | SA502a + pDB59 cm <sup>R</sup> ; <i>agr</i> type II YFP reporter;                                                                                                                                                                                                                                                                                                      | AH                  | <sup>11</sup> |
|                                   | AH1747            | MW2 + pDB59 cm <sup>R</sup> ; <i>agr</i> type III YFP reporter                                                                                                                                                                                                                                                                                                         | AH                  | <sup>11</sup> |
|                                   | AH1872            | MN EV (AH407) + pDB59 cm <sup>R</sup> ; <i>agr</i> type IV YFP reporter                                                                                                                                                                                                                                                                                                | AH                  | <sup>11</sup> |
|                                   | AH2759            | LAC + pAmiAgrP3 cm <sup>R</sup> ; <i>agr</i> P3- <i>lux</i> reporter                                                                                                                                                                                                                                                                                                   | AH                  | <sup>12</sup> |
|                                   | AH3052            | $\Delta spa$ mutant of LAC                                                                                                                                                                                                                                                                                                                                             | AH                  | <sup>13</sup> |
|                                   | AH1589            | $\Delta hla$ mutant of LAC                                                                                                                                                                                                                                                                                                                                             | AH                  | <sup>14</sup> |
|                                   | NRS225            | Clinical isolate from UK (1976). <i>mecA</i> +; <i>pen</i> <sup>R</sup> . CC121, ST121                                                                                                                                                                                                                                                                                 | NARSA               |               |
|                                   | NRS230            | Clinical isolate from 2 year old male in France (2002), associated with elbow arthritis with scarlet fever. <i>agr</i> type IV; <i>egc</i> +, ( <i>lukE-lukD</i> )+, <i>hlgv</i> +, <i>mecA</i> - <i>erm</i> <sup>R</sup> , <i>pen</i> <sup>R</sup> . ST121-SLV, CC121                                                                                                 | NARSA               |               |
|                                   | NRS232            | Clinical isolate (blood) from 4 year old male in France (2002), associated with necrotizing pneumonia. <i>agr</i> type I; <i>egc</i> +, ( <i>lukS-lukF PVL</i> )+, <i>hlg</i> +, <i>mecA</i> -; <i>erm</i> <sup>I</sup> , <i>gen</i> <sup>R</sup> , <i>pen</i> <sup>R</sup> ; 2 colony variants. ST22, CC22                                                            | NARSA               |               |
|                                   | NRS242            | Clinical isolate from 1 year old female in France (2002), associated with impetigo. <i>agr</i> type IV; <i>egc</i> +, ( <i>lukS-lukF</i> )+ PVL+, ( <i>lukE-lukD</i> )+, <i>hlgv</i> +, <i>mecA</i> - <i>erm</i> <sup>I</sup> , <i>pen</i> <sup>R</sup> . CC121, ST121                                                                                                 | NARSA               |               |
|                                   | NRS249            | Clinical isolate (blood) from 5 year old male in France (2002), associated with native valve endocarditis. <i>agr</i> type I; <i>sea</i> +, <i>hlgv</i> +, <i>mecA</i> +. <i>cipx</i> <sup>R</sup> , <i>cli</i> <sup>R</sup> , <i>erm</i> <sup>R</sup> , <i>gen</i> <sup>R</sup> , <i>oxa</i> <sup>R</sup> , <i>pen</i> <sup>R</sup> . SCCmec type IV. ST247, CC8(247) | NARSA               |               |
|                                   | NRS385; NR-46071  | Clinical isolate from USA. USA500, <i>agr</i> type I, <i>sea</i> +, <i>seb</i> +, SCCmecIV, <i>mecA</i> +. <i>cipx</i> <sup>R</sup> , <i>cli</i> <sup>R</sup> , <i>erm</i> <sup>R</sup> , <i>gen</i> <sup>R</sup> , <i>oxa</i> <sup>R</sup> , <i>pen</i> <sup>R</sup> , <i>tet</i> <sup>R</sup> , <i>tmp/sm</i> x <sup>R</sup> .                                       | NARSA               | <sup>15</sup> |
| <i>Staphylococcus epidermidis</i> | NIHLM001; HM896   | Isolated in 2008 from an alar crease of a healthy 27-year-old white male volunteer in the United States; a reference genome for the species. Genbank sequence: AKHC01000000                                                                                                                                                                                            | BEI; HMP            |               |

| Species                            | Strain ID                       | Characteristics <sup>†</sup>                                                                                                                                                                                                                                         | Source      | Ref. |
|------------------------------------|---------------------------------|----------------------------------------------------------------------------------------------------------------------------------------------------------------------------------------------------------------------------------------------------------------------|-------------|------|
|                                    | NRS101;<br>RP62A;<br>ATCC 35984 | Clinical isolate from USA, catheter sepsis. Prototype biofilm producer, produces polysaccharide adhesin. <i>mecA</i> <sup>+</sup> ; <i>clin</i> <sup>R</sup> , <i>erm</i> <sup>R</sup> , <i>gen</i> <sup>R</sup> , <i>oxa</i> <sup>R</sup> , <i>pen</i> <sup>R</sup> | NARSA       |      |
| <i>Staphylococcus haemolyticus</i> | NRS116                          | Clinical isolate from 45 year old male in USA (2002); variant small colony type of NRS115; <i>mecA</i> <sup>+</sup> ; <i>van</i> <sup>1</sup> ; <i>tec</i> <sup>1</sup>                                                                                              | NARSA       |      |
| <i>Staphylococcus warneri</i>      | SK66                            | Isolated from normal skin of right arm of healthy 57 year old male; a reference genome for the species. Genbank sequence: ACPZ00000000                                                                                                                               | BEI;<br>HMP |      |
| <i>Streptococcus mitis</i>         | F0392                           | Isolated from human oral cavity; a reference genome for the species                                                                                                                                                                                                  | BEI;<br>HMP |      |
| <i>Streptococcus pyogenes</i>      | MGAS15252                       | Clinical isolate from thigh of patient with an invasive soft tissue infection in Canada (2008); serotype M59, Group A <i>Streptococcus</i> . Genbank sequence: CP003116                                                                                              | BEI         |      |

<sup>†</sup>**Characteristics:** CC: clonal complex; ST: Sequence Type; I: Intermediate; R: Resistant; cm: chloramphenicol; cipx: ciprofloxacin; cli: clindamycin; erm: erythromycin; gen: gentamicin; oxa: oxacillin; pen: penicillin; tec: teicoplanin; tmp/smx: trimethoprim/sulfamethoxazole. van: vancomycin.

<sup>\*</sup>**Source:** AH: A. Horswill, U. Iowa; BEI: Biodefense and Emerging Infections Research Resources Repository; HMP: Human Microbiome Project; NARSA: Network on Antimicrobial Resistance in *Staphylococcus aureus*; MS: M. Smeltzer, UAMS.



## References Cited in Supplementary Files

- 1 Nocchi, S. R. *et al.* *In vitro* cytotoxicity and anti-herpes simplex virus Type 1 activity of hydroethanolic extract, fractions, and isolated compounds from stem bark of *Schinus terebinthifolius* Raddi. *Pharmacogn Mag* **12**, 160-164, doi:10.4103/0973-1296.177903 (2016).
- 2 Biasi-Garbin, R. P. *et al.* Antifungal potential of plant species from Brazilian Caatinga against dermatophytes. *Rev Inst Med Trop Sao Paulo* **58**, 18, doi:10.1590/S1678-9946201658018 (2016).
- 3 Moura-Costa, G. F. *et al.* Antimicrobial activity of plants used as medicinals on an indigenous reserve in Rio das Cobras, Parana, Brazil. *J Ethnopharmacol* **143**, 631-638, doi:10.1016/j.jep.2012.07.016 (2012).
- 4 Johann, S. *et al.* Antifungal activity of schinol and a new biphenyl compound isolated from *Schinus terebinthifolius* against the pathogenic fungus *Paracoccidioides brasiliensis*. *Ann Clin Microbiol Antimicrob* **9**, 1-6, doi:10.1186/1476-0711-9-30 (2010).
- 5 Cole, E. R. *et al.* Chemical composition of essential oil from ripe fruit of *Schinus terebinthifolius* Raddi and evaluation of its activity against wild strains of hospital origin. *Braz J Microbiol* **45**, 821-828 (2014).
- 6 El-Massry, K. F., El-Ghorab, A. H., Shaaban, H. A. & Shibamoto, T. Chemical compositions and antioxidant/antimicrobial activities of various samples prepared from *Schinus terebinthifolius* leaves cultivated in Egypt. *J Agric Food Chem* **57**, 5265-5270, doi:10.1021/jf900638c (2009).
- 7 Barbieri, D. S. V. *et al.* Antiadherent activity of *Schinus terebinthifolius* and *Croton urucurana* extracts on in vitro biofilm formation of *Candida albicans* and *Streptococcus mutans*. *Arch Oral Biol* **59**, 887-896, doi:10.1016/j.archoralbio.2014.05.006 (2014).
- 8 Boles, B., Thoendel, M., Roth, A. & Horswill, A. Identification of genes involved in polysaccharide-independent *Staphylococcus aureus* biofilm formation. *PLoS ONE* **5** (2010).
- 9 Gillaspay, A. *et al.* Role of the accessory gene regulator (*agr*) in pathogenesis of staphylococcal osteomyelitis. *Infect Immun* **63**, 3373-3380 (1995).
- 10 Beenken, K. E., Blevins, J. S. & Smeltzer, M. S. Mutation of *sarA* in *Staphylococcus aureus* limits biofilm formation. *Infect Immun* **71**, 4206-4211, doi:10.1128/IAI.71.7 (2003).
- 11 Kirchdoerfer, R. N. *et al.* Structural basis for ligand recognition and discrimination of a quorum-quenching antibody. *J Biol Chem* **286**, 17351-17358 (2011).
- 12 Figueroa, M. *et al.* Polyhydroxyanthraquinones as quorum sensing inhibitors from the guttates of *Penicillium restrictum* and their analysis by Desorption Electrospray Ionization Mass Spectrometry. *J Nat Prod* **77**, 1351-1358, doi:10.1021/np5000704 (2014).
- 13 Ibberson, C. B. *et al.* *Staphylococcus aureus* hyaluronidase is a CodY-regulated virulence factor. *Infect Immun* **82**, 4253-4264, doi:10.1128/iai.01710-14 (2014).
- 14 Olson, M. E. *et al.* *Staphylococcus aureus* nuclease is an SaeRS-dependent virulence factor. *Infect Immun* **81**, 1316-1324, doi:10.1128/iai.01242-12 (2013).
- 15 McDougal, L. K. *et al.* Pulsed-field gel electrophoresis typing of oxacillin-resistant *Staphylococcus aureus* isolates from the United States: Establishing a national database. *J Clin Microbiol* **41**, 5113-5120 (2003).
